# Supplementary material
Source: MDPI journal article supplement (https://www.mdpi.com/2071-1050/10/10/3658)
Supplement: s1 [file s1]

| Dados da exploração                                                                                                                                                                                                                                                                                                                                 |                                                                                                                                                                                                               |                                    |       |                         |       |                                                  |             |                                  |       |       |       |        |        |        |
|-----------------------------------------------------------------------------------------------------------------------------------------------------------------------------------------------------------------------------------------------------------------------------------------------------------------------------------------------------|---------------------------------------------------------------------------------------------------------------------------------------------------------------------------------------------------------------|------------------------------------|-------|-------------------------|-------|--------------------------------------------------|-------------|----------------------------------|-------|-------|-------|--------|--------|--------|
| Período a que se reportam os dados                                                                                                                                                                                                                                                                                                                  | Inicio                                                                                                                                                                                                        |                                    |       |                         |       |                                                  |             |                                  |       |       |       |        |        |        |
|                                                                                                                                                                                                                                                                                                                                                     | Fim                                                                                                                                                                                                           |                                    |       |                         |       |                                                  |             |                                  |       |       |       |        |        |        |
| Instruções: Data (mês/ano) de início e fim do período a que se reportam os dados. Caso sejam fornecidos dados para apenas 1 ano, deve utilizar-se o mais recente. Pode também ser utilizado um ano médio de referência                                                                                                                              |                                                                                                                                                                                                               |                                    |       |                         |       |                                                  |             |                                  |       |       |       |        |        |        |
| Tipo de ordenha                                                                                                                                                                                                                                                                                                                                     |                                                                                                                                                                                                               |                                    |       |                         |       |                                                  |             |                                  |       |       |       |        |        |        |
|                                                                                                                                                                                                                                                                                                                                                     | Ordenha fixa                                                                                                                                                                                                  | Capacidade de armazenamento (Ltrs) |       |                         |       |                                                  |             | Potência da unidade ordenha (Cv) |       |       |       |        |        |        |
| Instruções: 2 opções de resposta: Fixa - sala de ordenha na exploração; e Móvel - unidade móvel (camião) que realiza a ordenha na exploração                                                                                                                                                                                                        |                                                                                                                                                                                                               |                                    |       |                         |       |                                                  |             |                                  |       |       |       |        |        |        |
| Rotação agrícola                                                                                                                                                                                                                                                                                                                                    | Existe rotação?                                                                                                                                                                                               |                                    |       |                         |       |                                                  |             |                                  |       |       |       |        |        |        |
|                                                                                                                                                                                                                                                                                                                                                     |                                                                                                                                                                                                               | Descrição da rotação (se existir)  |       |                         |       |                                                  |             |                                  |       |       |       |        |        |        |
| Instruções: 2 opções de resposta: Sim - se existir rotação entre pastagem e outras culturas; e Não - caso não exista rotação                                                                                                                                                                                                                        |                                                                                                                                                                                                               |                                    |       |                         |       |                                                  |             |                                  |       |       |       |        |        |        |
| Agentes de limpeza                                                                                                                                                                                                                                                                                                                                  | Agente 1                                                                                                                                                                                                      | Nome                               |       | Quantidade anual (Ltrs) |       | Outras instalações e/ou atividades na exploração | Atividade 1 |                                  |       |       |       |        |        |        |
|                                                                                                                                                                                                                                                                                                                                                     | Agente 2                                                                                                                                                                                                      |                                    |       |                         |       |                                                  | Atividade 2 |                                  |       |       |       |        |        |        |
|                                                                                                                                                                                                                                                                                                                                                     | Agente 3                                                                                                                                                                                                      |                                    |       |                         |       |                                                  | Atividade 3 |                                  |       |       |       |        |        |        |
|                                                                                                                                                                                                                                                                                                                                                     | Agente 4                                                                                                                                                                                                      |                                    |       |                         |       |                                                  | Atividade 4 |                                  |       |       |       |        |        |        |
|                                                                                                                                                                                                                                                                                                                                                     | Agente 5                                                                                                                                                                                                      |                                    |       |                         |       |                                                  | Atividade 5 |                                  |       |       |       |        |        |        |
|                                                                                                                                                                                                                                                                                                                                                     | Instruções: agentes de limpeza utilizados na exploração, nomeadamente na sala de ordenha (devem ser preenchidos apenas o numero de agentes de limpeza utilizados). Este podem ser obtidos através das faturas |                                    |       |                         |       |                                                  |             |                                  |       |       |       |        |        |        |
| Instruções: caso existam instalações e/ou atividades na exploração não relacionadas com a produção de leite devem ser enumeradas (exemplo: casa pessoal do produtor)                                                                                                                                                                                |                                                                                                                                                                                                               |                                    |       |                         |       |                                                  |             |                                  |       |       |       |        |        |        |
| Eletricidade mensal/anual cons. (kWh)                                                                                                                                                                                                                                                                                                               |                                                                                                                                                                                                               | Anual                              | Mês 1 | Mês 2                   | Mês 3 | Mês 4                                            | Mês 5       | Mês 6                            | Mês 7 | Mês 8 | Mês 9 | Mês 10 | Mês 11 | Mês 12 |
| Instruções: valor de eletricidade consumido referente à produção de leite e na produção de culturas para alimentação animal. Pode preenchido recorrendo às faturas de eletricidade (caso seja preferível o valor pode ser apresentado em €). Preferencialmente deve ser apresentado o valor mensal, caso não seja possível apresentar o valor anual |                                                                                                                                                                                                               |                                    |       |                         |       |                                                  |             |                                  |       |       |       |        |        |        |
| Diesel mensal/anual cons. (Ltrs)                                                                                                                                                                                                                                                                                                                    |                                                                                                                                                                                                               | Anual                              | Mês 1 | Mês 2                   | Mês 3 | Mês 4                                            | Mês 5       | Mês 6                            | Mês 7 | Mês 8 | Mês 9 | Mês 10 | Mês 11 | Mês 12 |
| Instruções: valor de diesel consumido referente à produção de leite e na produção de culturas para alimentação animal. Pode preenchido recorrendo às faturas de diesel (caso seja preferível o valor pode ser apresentado em €). Preferencialmente deve ser apresentado o valor mensal, caso não seja possível apresentar o valor anual             |                                                                                                                                                                                                               |                                    |       |                         |       |                                                  |             |                                  |       |       |       |        |        |        |
| Gasolina mensal/anual cons. (Ltrs)                                                                                                                                                                                                                                                                                                                  |                                                                                                                                                                                                               | Anual                              | Mês 1 | Mês 2                   | Mês 3 | Mês 4                                            | Mês 5       | Mês 6                            | Mês 7 | Mês 8 | Mês 9 | Mês 10 | Mês 11 | Mês 12 |
| Instruções: valor de gasolina consumido referente à produção de leite e na produção de culturas para alimentação animal. Pode preenchido recorrendo às faturas de gasolina (caso seja preferível o valor pode ser apresentado em €). Preferencialmente deve ser apresentado o valor mensal, caso não seja possível apresentar o valor anual         |                                                                                                                                                                                                               |                                    |       |                         |       |                                                  |             |                                  |       |       |       |        |        |        |
| Gás mensal/anual consumido (m3)                                                                                                                                                                                                                                                                                                                     |                                                                                                                                                                                                               | Anual                              | Mês 1 | Mês 2                   | Mês 3 | Mês 4                                            | Mês 5       | Mês 6                            | Mês 7 | Mês 8 | Mês 9 | Mês 10 | Mês 11 | Mês 12 |
| Instruções: valor de gás consumido referente à produção de leite e na produção de culturas para alimentação animal. Pode preenchido recorrendo às faturas de gás (caso seja preferível o valor pode ser apresentado em €). Preferencialmente deve ser apresentado o valor mensal, caso não seja possível apresentar o valor anual                   |                                                                                                                                                                                                               |                                    |       |                         |       |                                                  |             |                                  |       |       |       |        |        |        |

| Efetivo pecuário                                                                                                                                                |       |       |       |                                                                                |       |       |       |                                                                      |       |       |        |        |        |
|-----------------------------------------------------------------------------------------------------------------------------------------------------------------|-------|-------|-------|--------------------------------------------------------------------------------|-------|-------|-------|----------------------------------------------------------------------|-------|-------|--------|--------|--------|
| <b>Raça do efetivo</b> <input type="text"/>                                                                                                                     |       |       |       | <b>Peso corporal médio</b> <input type="text"/> kg/animal                      |       |       |       | <b>Tempo de vida médio</b> <input type="text"/> anos/animal          |       |       |        |        |        |
| <i>Instruções: raça do efetivo animal, caso exista cruzamentos entre raças devem ser indicados (caso não seja apresentado será considerado Holstein-Frisia)</i> |       |       |       | <i>Instruções: peso médio dos animais que se encontram em estado produtivo</i> |       |       |       | <i>Instruções: tempo médio de vida do animal em estado produtivo</i> |       |       |        |        |        |
| <b>Tempo de estabulação</b> <input type="text"/> horas/dia/animal                                                                                               |       |       |       | <b>Idade do novilho à saída da exploração</b> <input type="text"/> meses       |       |       |       |                                                                      |       |       |        |        |        |
| <b>Tipo de estabulação</b> <input type="text"/>                                                                                                                 |       |       |       | <i>Instruções: idade média dos novilhas quando retirados da exploração</i>     |       |       |       |                                                                      |       |       |        |        |        |
| <i>Instruções: número de horas médio que o animal passa no estábulo nas 24h do dia</i>                                                                          |       |       |       |                                                                                |       |       |       |                                                                      |       |       |        |        |        |
| <b>Efetivo mensal produtivo</b>                                                                                                                                 | Anual | Mês 1 | Mês 2 | Mês 3                                                                          | Mês 4 | Mês 5 | Mês 6 | Mês 7                                                                | Mês 8 | Mês 9 | Mês 10 | Mês 11 | Mês 12 |
| <i>Instruções: número médio de animais produtivos que se encontram na exploração</i>                                                                            |       |       |       |                                                                                |       |       |       |                                                                      |       |       |        |        |        |

| Produção leiteira                                                                                                                                                       |       |       |       |                                                                                                                                          |       |       |       |       |       |       |        |        |        |
|-------------------------------------------------------------------------------------------------------------------------------------------------------------------------|-------|-------|-------|------------------------------------------------------------------------------------------------------------------------------------------|-------|-------|-------|-------|-------|-------|--------|--------|--------|
| <b>Produção mensal (Ltrs)</b>                                                                                                                                           | Anual | Mês 1 | Mês 2 | Mês 3                                                                                                                                    | Mês 4 | Mês 5 | Mês 6 | Mês 7 | Mês 8 | Mês 9 | Mês 10 | Mês 11 | Mês 12 |
| <i>Instruções: produção média de leite na exploração. Preferencialmente deve ser fornecido o valor mensal, caso não seja possível, deve ser fornecido o valor anual</i> |       |       |       |                                                                                                                                          |       |       |       |       |       |       |        |        |        |
| <b>Teor de proteína médio</b> <input type="text"/> %                                                                                                                    |       |       |       | <b>Teor de gordura médio</b> <input type="text"/> %                                                                                      |       |       |       |       |       |       |        |        |        |
| <i>Instruções: teor médio de proteína no leite recolhido (caso não seja possível obter o valor será utilizado o valor médio nacional)</i>                               |       |       |       | <i>Instruções: teor médio de gordura no leite recolhido (caso não seja possível obter o valor será utilizado o valor médio nacional)</i> |       |       |       |       |       |       |        |        |        |

| Alimentação animal                                                                                                                                                            |       |       |       |                                                                                                                                                                                                                                                               |       |       |       |       |       |       |        |        |        |
|-------------------------------------------------------------------------------------------------------------------------------------------------------------------------------|-------|-------|-------|---------------------------------------------------------------------------------------------------------------------------------------------------------------------------------------------------------------------------------------------------------------|-------|-------|-------|-------|-------|-------|--------|--------|--------|
| <b>Nome do alimento concentrado</b> <input type="text"/>                                                                                                                      |       |       |       | <b>Constituição do alimento concentrado</b>                                                                                                                                                                                                                   |       |       |       |       |       |       |        |        |        |
| <b>Fabricante</b> <input type="text"/>                                                                                                                                        |       |       |       | <b>Ingrediente 1</b> <input type="text"/> <b>Ingrediente 6</b> <input type="text"/>                                                                                                                                                                           |       |       |       |       |       |       |        |        |        |
| <b>Finalidade do alimento</b> <input type="text"/>                                                                                                                            |       |       |       | <b>Ingrediente 2</b> <input type="text"/> <b>Ingrediente 7</b> <input type="text"/>                                                                                                                                                                           |       |       |       |       |       |       |        |        |        |
| <i>Nota: deve ser preenchida um tabela igual para cada alimento comercial diferente (marca e/ou constituintes) utilizado</i>                                                  |       |       |       | <b>Ingrediente 3</b> <input type="text"/> <b>Ingrediente 8</b> <input type="text"/>                                                                                                                                                                           |       |       |       |       |       |       |        |        |        |
| <i>Instruções: Finalidade diz respeito a que tipo de animal e fase (exemplo: engorda de novilho ou animal adulto) o alimento se destina</i>                                   |       |       |       | <b>Ingrediente 4</b> <input type="text"/> <b>Ingrediente 9</b> <input type="text"/>                                                                                                                                                                           |       |       |       |       |       |       |        |        |        |
|                                                                                                                                                                               |       |       |       | <b>Ingrediente 5</b> <input type="text"/> <b>Ingrediente 10</b> <input type="text"/>                                                                                                                                                                          |       |       |       |       |       |       |        |        |        |
| <i>Instruções: Finalidade diz respeito a que tipo de animal e fase (exemplo: engorda de novilho ou animal adulto) o alimento se destina</i>                                   |       |       |       | <i>Instruções: nome dos ingredientes presentes no alimento concentrado fornecido aos animais (poderá ser obtido no rótulo do alimento concentrado). Deve ser preenchido o numero de ingredientes correspondente aos ingredientes presentes no concentrado</i> |       |       |       |       |       |       |        |        |        |
| <b>Consumo de concentrado (kg/animal em ordenha)</b>                                                                                                                          | Anual | Mês 1 | Mês 2 | Mês 3                                                                                                                                                                                                                                                         | Mês 4 | Mês 5 | Mês 6 | Mês 7 | Mês 8 | Mês 9 | Mês 10 | Mês 11 | Mês 12 |
| <i>Instruções: alimento concentrado médio consumido por animal durante a ordenha (caso não seja possível obter o consumo mensal deve ser apresentado o valor médio anual)</i> |       |       |       |                                                                                                                                                                                                                                                               |       |       |       |       |       |       |        |        |        |

| Outros alimentos                                                                                                                                                                                                                                                        |                          |       |                      |                      |                      |                      |                      |                      |                      |                      |                      |                      |                      |                      |
|-------------------------------------------------------------------------------------------------------------------------------------------------------------------------------------------------------------------------------------------------------------------------|--------------------------|-------|----------------------|----------------------|----------------------|----------------------|----------------------|----------------------|----------------------|----------------------|----------------------|----------------------|----------------------|----------------------|
|                                                                                                                                                                                                                                                                         |                          | Anual | Mês 1                | Mês 2                | Mês 3                | Mês 4                | Mês 5                | Mês 6                | Mês 7                | Mês 8                | Mês 9                | Mês 10               | Mês 11               | Mês 12               |
| Consumo de silagem, forragem, palha, cereais e/ou outros                                                                                                                                                                                                                | <b>Silagem de milho</b>  | 1     | <input type="text"/> |
|                                                                                                                                                                                                                                                                         | <b>Silagem de trigo</b>  | 2     | <input type="text"/> |
|                                                                                                                                                                                                                                                                         | <b>Palha de milho</b>    | 3     | <input type="text"/> |
|                                                                                                                                                                                                                                                                         | <b>Milho em grão</b>     | 4     | <input type="text"/> |
|                                                                                                                                                                                                                                                                         | <b>Forragem de trigo</b> | 5     | <input type="text"/> |
|                                                                                                                                                                                                                                                                         | <b>Outro 1 (qual?)</b>   | 6     | <input type="text"/> |
|                                                                                                                                                                                                                                                                         | <b>Outro 3 (qual?)</b>   | 7     | <input type="text"/> |
|                                                                                                                                                                                                                                                                         | <b>Outro 3 (qual?)</b>   | 8     | <input type="text"/> |
| <i>Nota: a cada um destes deve ser preenchida uma tabela da folha "Prod. produzidos na exploração"</i>                                                                                                                                                                  |                          |       |                      |                      |                      |                      |                      |                      |                      |                      |                      |                      |                      |                      |
| <i>Instruções: deve ser preenchido com todo o tipo de silagem, forragem, palha, cereais e/ou outros produtos fornecidos aos animais com alimento e produzido na exploração (caso não seja possível obter o consumo mensal deve ser apresentado o valor médio anual)</i> |                          |       |                      |                      |                      |                      |                      |                      |                      |                      |                      |                      |                      |                      |

| Pastagem                                                                                                                                                                                                                 |                |       |       |                                                                                                                                                                                                                               |             |       |                 |                      |                                                                                                                                                                                                                                                                                                           |                |         |                 |                 |        |
|--------------------------------------------------------------------------------------------------------------------------------------------------------------------------------------------------------------------------|----------------|-------|-------|-------------------------------------------------------------------------------------------------------------------------------------------------------------------------------------------------------------------------------|-------------|-------|-----------------|----------------------|-----------------------------------------------------------------------------------------------------------------------------------------------------------------------------------------------------------------------------------------------------------------------------------------------------------|----------------|---------|-----------------|-----------------|--------|
| Área de pastoreio (ha)                                                                                                                                                                                                   |                | Anual | Mês 1 | Mês 2                                                                                                                                                                                                                         | Mês 3       | Mês 4 | Mês 5           | Mês 6                | Mês 7                                                                                                                                                                                                                                                                                                     | Mês 8          | Mês 9   | Mês 10          | Mês 11          | Mês 12 |
| Instruções: área mensal de pastagem, preferencialmente deve ser preenchida a área mensal contudo caso seja constante ao longo do ano, ou não seja possível obter o valor mensal deve ser apresentado o valor médio anual |                |       |       |                                                                                                                                                                                                                               |             |       |                 |                      |                                                                                                                                                                                                                                                                                                           |                |         |                 |                 |        |
| Constituintes da pastagem                                                                                                                                                                                                | Constituinte 1 |       | %     | Operações agrícolas                                                                                                                                                                                                           | Operação 1  | Nome  | Duração (horas) | Maquinaria utilizada | Data (mês)                                                                                                                                                                                                                                                                                                | Fert./Pest. 1  | Nome    | Quantidade (kg) | Aplicação (mês) |        |
|                                                                                                                                                                                                                          | Constituinte 2 |       | %     |                                                                                                                                                                                                                               | Operação 2  |       |                 |                      |                                                                                                                                                                                                                                                                                                           | Fert./Pest. 2  |         |                 |                 |        |
|                                                                                                                                                                                                                          | Constituinte 3 |       | %     |                                                                                                                                                                                                                               | Operação 3  |       |                 |                      |                                                                                                                                                                                                                                                                                                           | Fert./Pest. 3  |         |                 |                 |        |
|                                                                                                                                                                                                                          | Constituinte 4 |       | %     |                                                                                                                                                                                                                               | Operação 4  |       |                 |                      |                                                                                                                                                                                                                                                                                                           | Fert./Pest. 4  |         |                 |                 |        |
|                                                                                                                                                                                                                          | Constituinte 5 |       | %     |                                                                                                                                                                                                                               | Operação 5  |       |                 |                      |                                                                                                                                                                                                                                                                                                           | Fert./Pest. 5  |         |                 |                 |        |
|                                                                                                                                                                                                                          |                |       |       |                                                                                                                                                                                                                               | Operação 6  |       |                 |                      |                                                                                                                                                                                                                                                                                                           | Fert./Pest. 6  |         |                 |                 |        |
|                                                                                                                                                                                                                          |                |       |       |                                                                                                                                                                                                                               | Operação 7  |       |                 |                      |                                                                                                                                                                                                                                                                                                           | Fert./Pest. 7  |         |                 |                 |        |
|                                                                                                                                                                                                                          |                |       |       |                                                                                                                                                                                                                               | Operação 8  |       |                 |                      |                                                                                                                                                                                                                                                                                                           | Fert./Pest. 8  |         |                 |                 |        |
|                                                                                                                                                                                                                          |                |       |       |                                                                                                                                                                                                                               | Operação 9  |       |                 |                      |                                                                                                                                                                                                                                                                                                           | Fert./Pest. 9  |         |                 |                 |        |
|                                                                                                                                                                                                                          |                |       |       |                                                                                                                                                                                                                               | Operação 10 |       |                 |                      |                                                                                                                                                                                                                                                                                                           | Fert./Pest. 10 |         |                 |                 |        |
|                                                                                                                                                                                                                          |                |       |       |                                                                                                                                                                                                                               |             |       |                 |                      |                                                                                                                                                                                                                                                                                                           |                | Estrume |                 |                 |        |
| Instruções: preencher com o nome dos principais constituintes semeados nas pastagens. Caso não seja possível obter deve ser apresentado o nome da mistura semeada (por exemplo, Avex).                                   |                |       |       | Instruções: operações agrícolas que ocorreram num ano típico de atividade, assim como a duração, a máquina agrícola e ainda o mês em que foi realizada (devem ser preenchidos de acordo com o número de operações realizadas) |             |       |                 |                      | Instruções: nome do fertilizante ou pesticida utilizados, com as quantidades respetivas e ainda o mês em que foi aplicado. O fertilizante com o nome "Estrume" deve ser utilizado para todo o tipo de fertilizante orgânico (estrume, chorume, etc). Estes dados podem obtidos na faturação da exploração |                |         |                 |                 |        |

| Produtos agrícolas utilizados na produção de leite (incluindo alimentação)                                                                                                                                              |  |                                                                                                                                                                                                                                              |                         |                 |       |                      |       |            |       |                                       |       |                                                                                                                                                                                                                                                               |        |                 |                 |
|-------------------------------------------------------------------------------------------------------------------------------------------------------------------------------------------------------------------------|--|----------------------------------------------------------------------------------------------------------------------------------------------------------------------------------------------------------------------------------------------|-------------------------|-----------------|-------|----------------------|-------|------------|-------|---------------------------------------|-------|---------------------------------------------------------------------------------------------------------------------------------------------------------------------------------------------------------------------------------------------------------------|--------|-----------------|-----------------|
| Nome                                                                                                                                                                                                                    |  | Instruções: deve ser preenchida uma tabela destas para cada um dos produtos produzidos na exploração que são utilizados na alimentação animal (todo o tipo de silagem, forragem, palha, cereais e/ou outros produtos fornecidos aos animais) |                         |                 |       |                      |       |            |       |                                       |       |                                                                                                                                                                                                                                                               |        |                 |                 |
| Área mensal/anual (ha)                                                                                                                                                                                                  |  | Anual                                                                                                                                                                                                                                        | Mês 1                   | Mês 2           | Mês 3 | Mês 4                | Mês 5 | Mês 6      | Mês 7 | Mês 8                                 | Mês 9 | Mês 10                                                                                                                                                                                                                                                        | Mês 11 | Mês 12          |                 |
| Instruções: área mensal da cultura, preferencialmente deve ser preenchida a área mensal contudo caso seja constante ao longo do ano, ou não seja possível obter o valor mensal deve ser apresentado o valor médio anual |  |                                                                                                                                                                                                                                              |                         |                 |       |                      |       |            |       |                                       |       |                                                                                                                                                                                                                                                               |        |                 |                 |
| Produção no corte (kg)                                                                                                                                                                                                  |  | Anual                                                                                                                                                                                                                                        | Mês (ou meses) de corte |                 |       |                      |       |            |       |                                       |       |                                                                                                                                                                                                                                                               |        |                 |                 |
| Instruções: produção anual obtida e o mês (ou meses) em que é que realizado o corte                                                                                                                                     |  |                                                                                                                                                                                                                                              |                         |                 |       |                      |       |            |       |                                       |       |                                                                                                                                                                                                                                                               |        |                 |                 |
| Sementes utilizadas (kg)<br><br>Instruções: quantidade de sementes utilizadas por ano                                                                                                                                   |  | Nome                                                                                                                                                                                                                                         |                         | Duração (horas) |       | Maquinaria utilizada |       | Data (mês) |       | Fertilizantes e Pesticidas utilizados |       | Nome                                                                                                                                                                                                                                                          |        | Quantidade (kg) | Aplicação (mês) |
|                                                                                                                                                                                                                         |  | Operação 1                                                                                                                                                                                                                                   |                         |                 |       |                      |       |            |       | Fert./Pest. 1                         |       |                                                                                                                                                                                                                                                               |        |                 |                 |
|                                                                                                                                                                                                                         |  | Operação 2                                                                                                                                                                                                                                   |                         |                 |       |                      |       |            |       | Fert./Pest. 2                         |       |                                                                                                                                                                                                                                                               |        |                 |                 |
|                                                                                                                                                                                                                         |  | Operação 3                                                                                                                                                                                                                                   |                         |                 |       |                      |       |            |       | Fert./Pest. 3                         |       |                                                                                                                                                                                                                                                               |        |                 |                 |
|                                                                                                                                                                                                                         |  | Operação 4                                                                                                                                                                                                                                   |                         |                 |       |                      |       |            |       | Fert./Pest. 4                         |       |                                                                                                                                                                                                                                                               |        |                 |                 |
|                                                                                                                                                                                                                         |  | Operação 5                                                                                                                                                                                                                                   |                         |                 |       |                      |       |            |       | Fert./Pest. 5                         |       |                                                                                                                                                                                                                                                               |        |                 |                 |
|                                                                                                                                                                                                                         |  | Operação 6                                                                                                                                                                                                                                   |                         |                 |       |                      |       |            |       | Fert./Pest. 6                         |       |                                                                                                                                                                                                                                                               |        |                 |                 |
|                                                                                                                                                                                                                         |  | Operação 7                                                                                                                                                                                                                                   |                         |                 |       |                      |       |            |       | Fert./Pest. 7                         |       |                                                                                                                                                                                                                                                               |        |                 |                 |
|                                                                                                                                                                                                                         |  | Operação 8                                                                                                                                                                                                                                   |                         |                 |       |                      |       |            |       | Fert./Pest. 8                         |       |                                                                                                                                                                                                                                                               |        |                 |                 |
|                                                                                                                                                                                                                         |  | Operação 9                                                                                                                                                                                                                                   |                         |                 |       |                      |       |            |       | Fert./Pest. 9                         |       |                                                                                                                                                                                                                                                               |        |                 |                 |
|                                                                                                                                                                                                                         |  | Operação 10                                                                                                                                                                                                                                  |                         |                 |       |                      |       |            |       | Fert./Pest. 10                        |       |                                                                                                                                                                                                                                                               |        |                 |                 |
| Instruções: quantidade de sementes utilizadas por ano                                                                                                                                                                   |  | Instruções: operações agrícolas que ocorreram num ano típico de atividade, assim como a duração, a máquina agrícola e ainda o mês em que foi realizada (devem ser preenchidos apenas o número de operações realizadas)                       |                         |                 |       |                      |       |            |       |                                       |       | Instruções: nome do fertilizante ou pesticida utilizados, com as quantidades respetivas e ainda o mês em que foi aplicado. O fertilizante com o nome "Estrume" deve ser utilizada para todo o tipo de fertilizante orgânico (estrume, chorume, composto, etc) |        |                 |                 |
